# Supplementary material for: Induction of B- to Z-DNA transition by copper and zinc complexes with C(15) substituted macrocyclic pentaaza ligands
Source: Royal Society of Chemistry journal article supplement (doi:10.1039/b500317b), 2005-01-01
Supplement: b500317b.pdf [file b500317b.pdf]

Supporting Information for:

## Induction of B- to Z-DNA transition by copper and zinc complexes with C(15) substituted macrocyclic pentaaza ligands.

Bernhard Spingler\*<sup>a</sup> and Chiara Da Pieve<sup>a</sup>

<sup>a</sup> University of Zürich, Winterthurerstr. 190, CH 8057 Zürich, Switzerland. Fax: +41 1 635 68 03; Tel: +41 1 635 46 56; E-mail: spingler@aci.unizh.ch

The ligand **1** crystallised by vapour diffusion of CH<sub>2</sub>Cl<sub>2</sub> and heptane into a solution of ethanol (Figure S1).

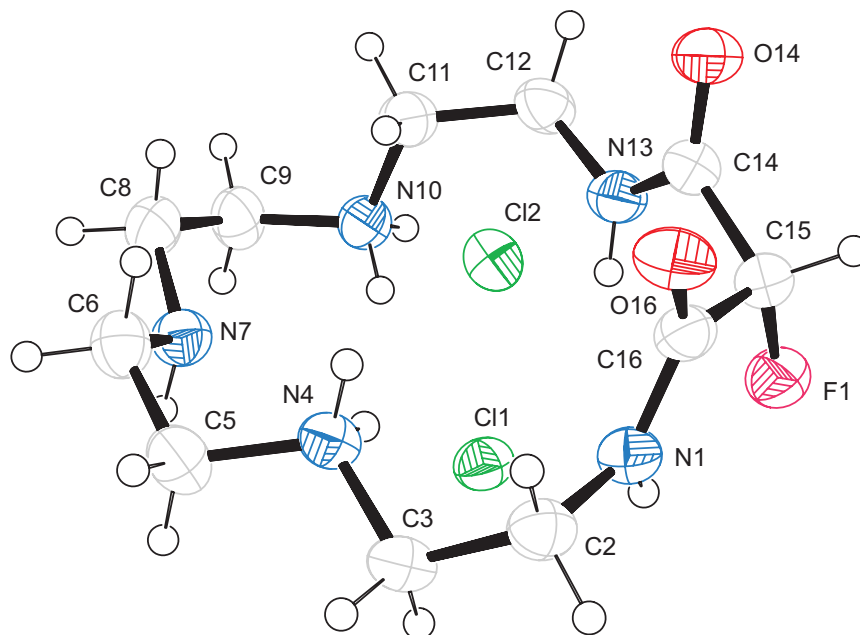

Figure S1. ORTEP plot of ligand **1**. (ellipsoids drawn at 50% probability).

The complex crystallised as a di-hydrochloride due to chloride abstraction from the solvent. The fluorine atom is in an axial position relative to the macrocyclic ring. Most likely this arrangement minimises the overall dipole moment of the carbonyl groups and the carbon - fluorine bond.

Crystals of **2** were grown as a di-hydrochloride salt by slow evaporation of ethanol (Figure S2). The chlorine atoms come from the tetraethylenepentamine used for the cyclisation that was not completely hydrochloride-free. To remove the hydrochlorides, **2** was purified by ion-exchange chromatography over AMBERLYST A-26 OH. In the crystal, ligand **2** is sitting on a mirror plane. The fluorine atom is occupying the axial position while the methyl group is in the equatorial position.

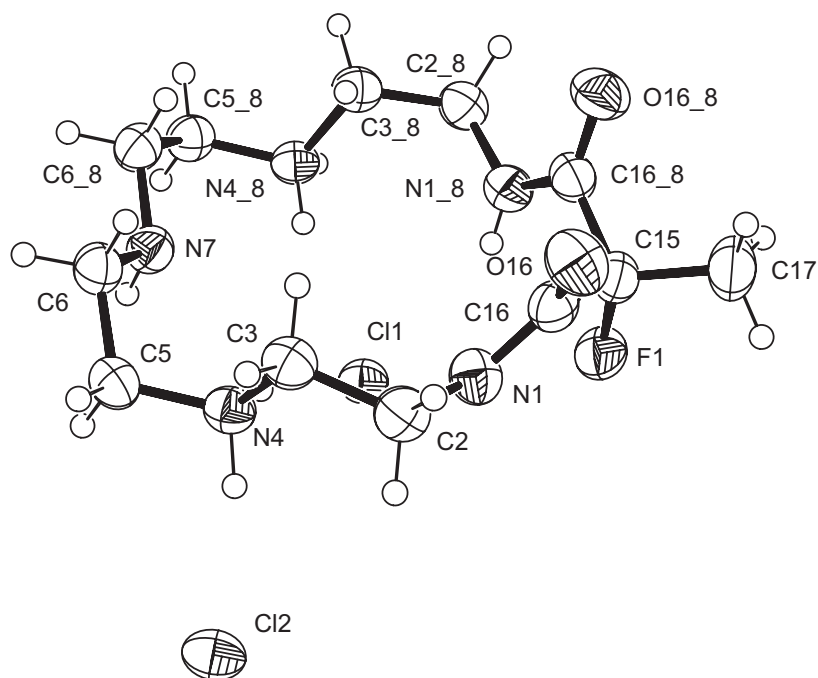

Figure S2. ORTEP plot of ligand 2. (ellipsoids drawn at 50% probability)

Ligand 3 crystallised by slow evaporation from an ethanolic solution. In the crystal structure the two carbonyl groups are pointing in opposite directions (Figure S3).

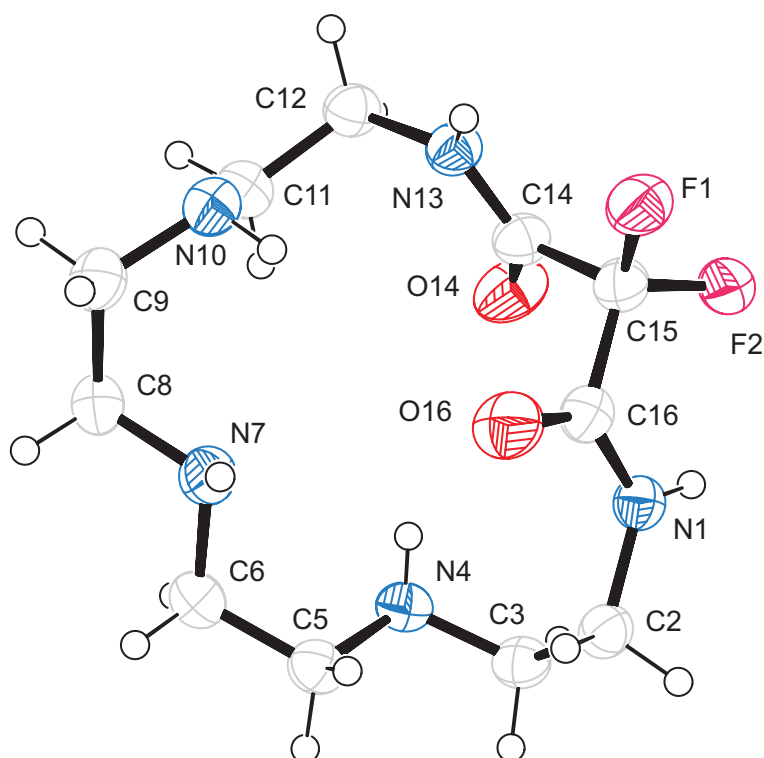

Figure S3. ORTEP plot of ligand 3. (ellipsoids drawn at 50% probability).

**Table S1: Crystallographic table for 1\*2 HCl, 2\*2 HCl, 3**

|                                                  | 1*2 HCl                                                                        | 2*2 HCl                                                                        | 3                                                                            |
|--------------------------------------------------|--------------------------------------------------------------------------------|--------------------------------------------------------------------------------|------------------------------------------------------------------------------|
| Empirical formula                                | C <sub>11</sub> H <sub>24</sub> Cl <sub>2</sub> FN <sub>5</sub> O <sub>2</sub> | C <sub>12</sub> H <sub>26</sub> Cl <sub>2</sub> FN <sub>5</sub> O <sub>2</sub> | C <sub>11</sub> H <sub>21</sub> F <sub>2</sub> N <sub>5</sub> O <sub>2</sub> |
| Colour                                           | Colourless                                                                     | Colourless                                                                     | Colourless                                                                   |
| Formula weight [g mol <sup>-1</sup> ]            | 348.25                                                                         | 362.28                                                                         | 293.33                                                                       |
| Crystal system                                   | Triclinic                                                                      | Orthorhombic                                                                   | Monoclinic                                                                   |
| Crystal dimensions (mm)                          | 0.19 x 0.14 x 0.11                                                             | 0.67 x 0.50 x 0.38                                                             | 0.63 x 0.60 x 0.12                                                           |
| Space group                                      | P-1                                                                            | Pnma                                                                           | P2 <sub>1</sub> /c                                                           |
| a [Å]                                            | 9.2491(9)                                                                      | 10.8155(5)                                                                     | 9.8251(7)                                                                    |
| b [Å]                                            | 9.902(1)                                                                       | 10.2095(5)                                                                     | 8.6399(5)                                                                    |
| c [Å]                                            | 10.053(1)                                                                      | 16.5041(11)                                                                    | 16.781(1)                                                                    |
| α [°]                                            | 82.753(12)                                                                     | 90                                                                             | 90                                                                           |
| β [°]                                            | 82.007(12)                                                                     | 90                                                                             | 96.343(8)                                                                    |
| γ [°]                                            | 65.594(11)                                                                     | 90                                                                             | 90                                                                           |
| Volume [Å <sup>3</sup> ]                         | 827.88(14)                                                                     | 1822.40(17)                                                                    | 1415.78(15)                                                                  |
| Z                                                | 2                                                                              | 4                                                                              | 4                                                                            |
| Absorption coefficient (μ, mm <sup>-1</sup> )    | 0.414                                                                          | 0.379                                                                          | 0.115                                                                        |
| Theta range for data collection [°]              | 2.94 to 30.53                                                                  | 3.01 to 30.51                                                                  | 3.29 to 30.44                                                                |
| Reflections collected                            | 17872                                                                          | 19450                                                                          | 18180                                                                        |
| Independent reflections                          | 4567 [R(int) = 0.0472]                                                         | 2905 [R(int) = 0.0895]                                                         | 4178 [R(int) = 0.0521]                                                       |
| Data/restraints/parameters                       | 4567/1/218                                                                     | 2905/0/125                                                                     | 4178/0/201                                                                   |
| Goodness-of-fit on F <sup>2</sup>                | 1.110                                                                          | 1.057                                                                          | 1.123                                                                        |
| Final R indices [I>2σ(I)]                        | R1 = 0.0581<br>wR2 = 0.1541                                                    | R1 = 0.0526<br>wR2 = 0.1508                                                    | R1 = 0.0631<br>wR2 = 0.1792                                                  |
| Largest diff. peak and hole (e Å <sup>-3</sup> ) | 0.580 and -0.576                                                               | 0.526 and -0.719                                                               | 0.393 and -0.261                                                             |

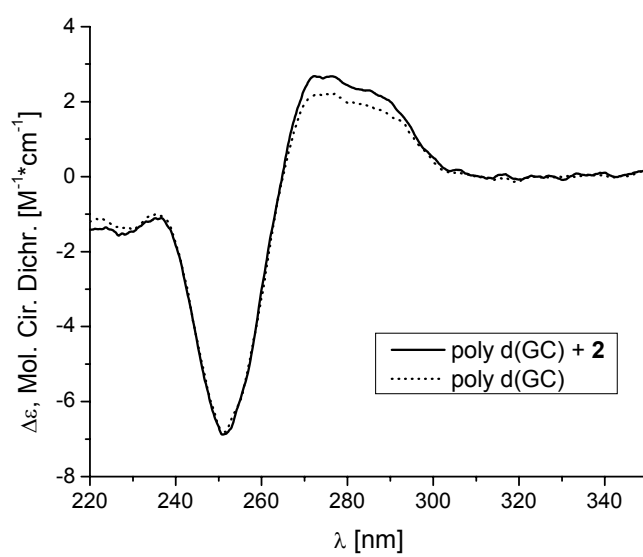

**Figure S4.** CD spectra of poly d(GC) before (dashed line) and after (straight line) the addition of ligand 2.
